1 **Invariant chain with an AP3 interacting sorting signal is sorted to late endosomal**  
2 **compartments and may improve MHC class I loading and presentation.**

3 Ana Kucera<sup>1</sup>, Nadia Mensali<sup>1, 2</sup>, Niladri Busan Pati<sup>1</sup>, Else Marit Inderberg<sup>2</sup>, Marit Renée  
4 Myhre<sup>2</sup>, Tone Fredsvik Gregers<sup>1</sup>, Sébastien Wälchli\*<sup>2</sup> and Oddmund Bakke\*<sup>1</sup>

5 <sup>1</sup> Department of Biosciences and Centre for Immune Regulation, University of Oslo, Norway

6 <sup>2</sup> Department of Cellular Therapy, Department of Oncology, Oslo University Hospital, Oslo,  
7 Norway.

8 \*Corresponding authors: Oddmund Bakke, [oddmund.bakke@ibv.uio.no](mailto:oddmund.bakke@ibv.uio.no) and Sébastien  
9 Wälchli, [sebastien.walchli@rr-research.no](mailto:sebastien.walchli@rr-research.no)

10 **Running title:** AP3 mediated li sorting to late endosomal compartment.

11 **Keywords:** invariant chain, MHC-I, late endosome, intracellular trafficking, adaptor protein,  
12 antigen loading and presentation.

13 **ABSTRACT**

14 Invariant chain (Ii) is traditionally known as the dedicated MHCII chaperone. Recent reports  
15 have broadened our understanding about various tasks that Ii plays including its  
16 physiological role in MHCI cross-presentation. Ii bound MHCI via the MHCII scaffolding CLIP  
17 peptide may facilitate MHCI trafficking to the endosomal pathway. The sorting function of Ii  
18 depends on two leucine-based sorting signals present in the cytoplasmic tail that acts as  
19 binding sites for the adaptor proteins AP-1/AP-2. Here we increased the Ii cross-presentation  
20 potency by replacing these with an AP3 motif resulting an efficient transport of Ii from TGN to  
21 late endosomes. We also replaced the CLIP region of Ii with a therapeutically relevant  
22 peptide, MART-1. We found the Ii AP3mutant-MART1 construct was capable of loading  
23 MHCI and stimulate specific T-cell response more efficiently than the wild type counterpart.  
24 The results show that Ii with an AP3 binding sorting motif carrying peptide epitope(s) can

25 promote efficient antigen presentation to cytotoxic T cells (CTLs) independent of the ER  
26 located classical MHCI peptide loading machinery.

27

## 28 **Introduction**

29 Vaccination demands successful immune response that in turn depends on activation of both  
30 CD8<sup>+</sup> and CD4<sup>+</sup> T cells in the context of major histocompatibility complex I and II (MHCI and  
31 II) antigen presentation. The processing of the antigen and its subsequent presentation on  
32 MHCI or MHC II at the surface of antigen presenting cells (APCs) requires the coordinated  
33 action of different accessory molecules and chaperones. Many strategies have been  
34 described to obtain a robust immune response, such as the use of carrier proteins to improve  
35 peptide loading to MHC molecules, and targeting of antigens to “favorable” intracellular  
36 pathways where MHC reside <sup>1-7</sup>. MHCI and MHCII are not loaded by the same cellular  
37 machinery, and they are dependent on different trafficking signals. A successful MHC II  
38 antigen presentation largely depends on Ii and peptide loading in the endosomal pathway,  
39 while MHCI peptide loading is independent of Ii and occurs primarily in the endoplasmic  
40 reticulum <sup>8</sup>.

41 The targeting to the endosomal pathway of MHCII relies on the two-leucine-based sorting  
42 signals Leu<sup>7</sup>/Ile<sup>8</sup> and Met<sup>16</sup>/Leu<sup>17</sup> of Ii <sup>9-11</sup>. These signals sequences are present in the  
43 cytoplasmic tail of Ii and bind the adaptor proteins AP-1 and AP-2 <sup>12, 13</sup>. These APs are  
44 generally found at the trans-Golgi network (TGN) (AP1) and plasma membrane (AP2) and  
45 act as coat proteins that bind the donor membrane in order to assemble a scaffold for vesicle  
46 budding <sup>14,15</sup>. The APs thus mediate sorting from the TGN to endosomes directly or via the  
47 cell surface. Upon entry into the endosomal pathway, Ii is sequentially degraded leaving the  
48 class II-associated Ii peptide (CLIP) bound to the MHCII groove. CLIP is subsequently  
49 exchanged for specific antigenic peptides in the later parts of the endosomal pathway prior to  
50 transport to the cell surface for presentation to CD4<sup>+</sup> T cells. Several vaccination studies have

51 shown that replacement of the CLIP region with an antigenic peptide can lead to efficient  
52 MHCII loading and specific presentation to CD4<sup>+</sup> T cells <sup>1, 2, 16</sup>.

53 The classical view is that MHCI encounters its (endogenous) antigenic peptides in the ER  
54 and this complex is transported to the PM and presents the antigen to the cytotoxic T cell <sup>17</sup>.  
55 However, it was demonstrated a few years ago that MHCI like MHCII may be loaded in the  
56 endolysosomal pathway guided by li <sup>18</sup>, but it was not shown where in the endosomal  
57 pathway this took place. An li-MHCI interaction was also demonstrated by van Luijn and  
58 coworkers who showed that CLIP efficiently binds to several MHCI molecules in leukemic  
59 cells <sup>19</sup>. Furthermore, our recent study showed an li with CLIP substituted by a MHCI specific  
60 tumor antigen is efficient enough to load MHCI and activate T cell specific response in a  
61 proteasome/TAP/tapasin independent manner <sup>20</sup>. This strategy was found to be as efficient  
62 as exogenous loading of synthetic peptide *in vitro*, and thus identified a novel loading  
63 pathway for MHCI which may lead to novel vaccine strategies. In one of our earlier study, we  
64 have shown that it is possible to redirect a fusion protein with the li tail to late endosomes by  
65 introducing this AP-3 binding motif to the cytoplasmic tail of the li <sup>21</sup>. Here we show that the  
66 introduction of AP-3 binding motif in li itself re-routed this molecule to proteolytic late  
67 endosomal compartments skipping the conventional trafficking route via the PM. As a  
68 consequence, this AP3 containing li protein had a dramatically shorter half-life than its wt  
69 counterpart. We have further investigated the potency of li-MHCI mediated antigen  
70 presentation with the li trafficking mutant designed to bind AP-3 <sup>21, 22</sup> where we replaced the  
71 CLIP region with the cancer relevant peptide MART-1 <sup>20, 23, 24</sup>. This mutant with CLIP/Mart-1  
72 replacement was found to have an improved potency to activate CD8<sup>+</sup> T-cells compared to  
73 the liwt and was able to increase the amount of peptide-MHCI on the plasma membrane  
74 (PM). Taken together, we find that an improved li-based antigen loading/presentation of this  
75 peptide may be achieved by routing the li and most likely also MHCI to a late stage of the  
76 endosomal pathway.

## 77 RESULTS

### 78 Biochemical characterization of liR4RP<sub>6</sub>/L<sub>17</sub>A

79 The liwt sorting signal (Q<sub>4</sub>RD<sub>6</sub>)L<sub>7</sub>I, found to bind the adaptors AP-1 and AP-2<sup>13</sup>, was  
80 replaced as shown in Figure 1A by an (R<sub>4</sub>RP<sub>6</sub>)L<sub>7</sub>I motif, which is a strong AP-3 binder<sup>22</sup> and  
81 found to mediate direct TGN to endosomal sorting<sup>21</sup>. We first tested whether the invariant  
82 chain with the AP3 motif, liR<sub>4</sub>RP<sub>6</sub>/L<sub>17</sub>A was a trimer. In addition to li wild type we included the  
83 double leucine mutant liL<sub>7</sub>A/L<sub>17</sub>A known to accumulate at the cell surface due to inactive  
84 sorting signals<sup>25</sup>. As shown, all constructs were able to form trimers suggesting that the  
85 cytosolic tail mutations did not affect the trimer assembly (Fig. 1B). The abundance of mutant  
86 li trimers even in the reduced sample shows the efficiency of the mutant li in making stable  
87 trimers that did not compromise on its structural stability (Fig. 1B). However, the protein  
88 amount of the AP3 mutant was significantly less than the two others.

89 Arginine motifs may mediate ER retention and the li mutant (MDDRRPL<sub>7</sub>I) could therefore  
90 affect li release from the ER thus reducing the total protein level of li<sup>26,27</sup>. To test for this, we  
91 performed an Endoglycosidase H (Endo H) treatment, where passage through the Golgi  
92 apparatus prior to endosomal sorting is monitored by acquisition of Endo H resistance<sup>28</sup>.  
93 Three li fractions were detected for the wild type and all the mutants of li (Fig. 1C). Thus, all  
94 constructs gained Endo H resistance indicating that despite the presence of the RRP amino  
95 acid sequence, the li mutant can egress the ER. Further to investigate why the level of  
96 liR<sub>4</sub>RP<sub>6</sub>/L<sub>17</sub>A is differed from liwt, we performed a pulse-chase experiment to monitor the half-  
97 life ( $t_{1/2}$ ) of this protein. Transfected cells were pulsed with <sup>35</sup>Met/<sup>35</sup>Cys containing media, and  
98 chased for various time points, followed by an immunoprecipitation of total li. As shown in  
99 Figure 1D, the  $t_{1/2}$  of liwt was approximately three hours, whereas liR<sub>4</sub>RP<sub>6</sub>/L<sub>17</sub>A had a half-life  
100 closer to one hour, which suggests a faster kinetic to late endosomal compartments.

101 liL<sub>7</sub>A/L<sub>17</sub>A shown to accumulate at the plasma membrane<sup>11</sup> was not degraded after four  
102 hours and served as a control. As shown earlier, a TFR fusion protein with the liR<sub>4</sub>RP<sub>6</sub>/L<sub>17</sub>A  
103 cytosolic tail can be targeted directly to the late endosomes/lysosomes<sup>21</sup>. The short half-life

104 indicates that li with the liR<sub>4</sub>RP<sub>6</sub>/L<sub>17</sub>A tail also followed this pathway. To test for such a late  
105 endosomal proteolytic localization of liR<sub>4</sub>RP<sub>6</sub>/L<sub>17</sub>A, we added either the Cathepsin S inhibitor  
106 or the broad protease inhibitor Leupeptin, both taken up by endocytosis to the transfected  
107 cells. A combination of both cathepsin S and leupeptin were able to protect liR<sub>4</sub>RP<sub>6</sub>/L<sub>17</sub>A from  
108 degradation while the li L<sub>7</sub>A/L<sub>17</sub>A remained protected with either of the protease inhibitors  
109 (Fig. 1E). As expected, the li wild type, trafficking to the endosomal pathway via the PM<sup>29,30</sup>  
110 was also protected by both Leupeptin and Cathepsin S. Interestingly, the liR<sub>4</sub>RP<sub>6</sub>/L<sub>17</sub>A  
111 mutant needed both the leupeptin and the cathepsin A inhibitor for maximal inhibition, most  
112 likely as this construct is targeted to late endosomes which are more difficult to reach by the  
113 endocytosed inhibitors than the wild type li which traffics via the PM.  
114 AP-1 is located at the TGN and AP-2 is a plasma membrane adaptor<sup>14</sup>, AP-3 is involved in  
115 binding and sorting of proteins to late endosomes and detected both at the TGN and  
116 between early and late endosomes and is therefore believed to be involved both in sorting  
117 from TGN to late endosomes and endosomal maturation<sup>31</sup>. To further study the pathway of  
118 our AP3 binding construct, we performed RNAi depletion of AP-3 and investigated the effect  
119 on the protein level. As shown in Figure 1F, AP-3 depletion resulted in a dramatic  
120 accumulation of both liR<sub>4</sub>RP<sub>6</sub>/L<sub>17</sub>A and liwt was also protected from degradation, but less.  
121 Together with the protective effect of the protease inhibitors in the endosomal pathway, such  
122 a strong protective influence of AP-3 depletion on liR<sub>4</sub>RP<sub>6</sub>/L<sub>17</sub>A is in line with a hypothesis  
123 that liR<sub>4</sub>RP<sub>6</sub>/L<sub>17</sub>A is sorted directly from TGN to the late proteolytic pathway. The control liwt  
124 is less affected as it is sorted via the PM and only affected by the endosomal maturation  
125 inhibition caused by the AP3 inhibition.

126

### 127 **Subcellular distribution of *liR<sub>4</sub>RP<sub>6</sub>/L<sub>17</sub>A***

128 The subcellular distribution and trafficking of liR<sub>4</sub>RP<sub>6</sub>/L<sub>17</sub>A was further investigated using live  
129 cell confocal imaging approach. Madine Derby Canine kidney (MDCK) cells were chosen for

130 their high tolerance for laser exposure. The cells were transfected with either liwt or  
131 liR<sub>4</sub>RP<sub>6</sub>/L<sub>17</sub>A N-terminally fused with red fluorescent protein mCherry, together with early and  
132 late endosomal markers, GFP-Rab5 or GFP-Rab7a respectively. To measure trafficking via  
133 the PM the cells were incubated with anti li-antibody, M-B741-Alexa647, one hour prior to  
134 imaging. It is furthermore known that liwt imposes enlargement of endosomes and causes a  
135 delay in endosomal maturation<sup>29, 32-34</sup>. Due to this delay, at early time points the antibody  
136 reach primarily early endosomes, but gradually throughout the next 2-4 hours, the antibody  
137 was also seen in late endosomes<sup>20, 29</sup>. We also observed enlarged endosomes in the cells  
138 transfected with liwt (Fig 2A and B) and colocalization with GFP-Rab5 and GFP-Rab7a,  
139 distributing almost equally (55-60%) within early and late compartments. In addition, more  
140 than 60% of liwt found to colocalize with M-B741-Alexa 647 (Fig. 2C), confirming trafficking  
141 via PM.

142 In contrast, mCherry-liR<sub>4</sub>RP<sub>6</sub>/L<sub>17</sub>A showed a 75% colocalization with the late endosomal  
143 marker GFP-Rab7a and less than 10% with GFP-Rab5 (Figure 2A and B). This cellular  
144 distribution indicated that the li mutant followed a direct sorting route to late endosomes  
145 circumventing the cell surface. In further support, we demonstrate that only 12% of mCherry-  
146 liRRP/L<sub>17</sub>A colocalized with M-B741-Alexa 647 (Fig. 2C), which corroborates direct sorting to  
147 late endosomes, and is in line with our biochemical characterization of liR<sub>4</sub>RP<sub>6</sub>/L<sub>17</sub>A. Because  
148 of its rapid turnover (Fig. 1D), and the accumulation in late endosomal compartments,  
149 liR<sub>4</sub>R<sub>6</sub>P/L<sub>17</sub>A, did not delay endosomal maturation. The residual uptake of M-B741 was most  
150 likely due high expression level of the mutant li in some of the cells being missorted to the  
151 PM. We confirmed our observations with li transduced SupT1 cells. In this assay, the li  
152 membrane expression was monitored by staining cells without prior permeabilization and  
153 later analyzed by flow cytometry (Fig. 2D). This demonstrated that the li mutant did not  
154 appear on the cell surface. Finally, we used live confocal imaging and confirmed that the  
155 liR<sub>4</sub>R<sub>6</sub>P/L<sub>17</sub>A mutation did not affect the previously described MHC1-li association<sup>20</sup>(Sup Fig.  
156 1).

## 157 **Soluble T cell receptors detect peptide loaded HLA-A2 from liR<sub>4</sub>RP<sub>6</sub>/L<sub>17</sub>A**

158 Since the liR<sub>4</sub>RP<sub>6</sub>/L<sub>17</sub>A mutant is re-routed to a degradation trafficking pathway, we tested  
159 whether such a CLIP replaced li construct combined with this tail mutation could still load  
160 MHCI. To this end, we first detected that the peptide-MHC complex of cell expressing  
161 different constructs with a soluble T cell receptor (sTCR)<sup>35</sup> specific for MART1p. sTCRs have  
162 a low affinity for their target, however, we were able to detect li-MART1p, inserted in the  
163 CLIP region of liR<sub>4</sub>RP<sub>6</sub>/L<sub>17</sub>A (Fig. 2E). Although very low, this result suggests that the  
164 peptide was well loaded on the MHCI molecule. As a control, cells expressing HLA-A2  
165 single-chain trimer (SCT) combined with MART-1 peptide (SCT-M1) were used and showed  
166 an expected saturating signal. Taken together, our data support an improved antigen loading  
167 ability of liR<sub>4</sub>RP<sub>6</sub>/L<sub>17</sub>A over the li wild type construct. In addition, the trafficking of li to the  
168 plasma membrane does not seem to be required to get an efficient loading.

## 169 **Cells expressing li carrying tumor-associated epitopes efficiently load HLA-A2 and** 170 **specifically activate CD8<sup>+</sup> T cells**

171 We have previously shown that li interacts with MHCI, and that the human MHCI allele, HLA-  
172 A\*02:01 (HLA-A2) colocalized with li throughout the endosomal pathway. We have also  
173 demonstrated that CLIP-replaced li efficiently activated antigen specific CTLs when  
174 expressed in HLA-compatible APC<sup>20</sup>. We therefore compared the ability of the liR<sub>4</sub>RP<sub>6</sub>/L<sub>17</sub>A  
175 mutant to load HLA-A2 peptides with the CLIP-replaced li construct (Fig. 3A). J76 cells stably  
176 expressing MART-1 specific TCR (DMF5)<sup>35</sup> were incubated with HLA-A2 positive cells  
177 expressing different li constructs. IL-2 secretion was used as a read-out for specific TCR  
178 stimulation; SCT-MART1 and SCT with an irrelevant peptide (SCT-irr) expressing cells were  
179 used as controls. When MART-1 peptide was loaded on HLA-A2 utilizing liR<sub>4</sub>R<sub>6</sub>P/L<sub>17</sub>A as  
180 carrier, the intensity of the stimulation was almost equal to the stimulation observed with  
181 SCT-M1, confirming an increase in peptide loading compared to liwt (Fig. 3B). In order to  
182 support these data, we performed a DC priming study using autologous donor cells. To this

183 end, we assessed the priming ability of DC transfected with li mutant (li17R4RP<sub>6</sub>/L<sub>17</sub>A MART-  
184 1) compared to liwt MART-1 or the MART-1 peptide. We found that the mutant li  
185 (li17R4RP<sub>6</sub>/L<sub>17</sub>AMART-1) was significantly more efficient and superior to peptide at priming  
186 primary CD8<sup>+</sup> T cells, whereas liwtMART-1 seemed to be improved but did not reach  
187 significance ( $p=0,052$ , Fig. 3C), hence at this stage can be considered equal to peptide  
188 loading. In addition the li17R4RP<sub>6</sub>/L<sub>17</sub>A MART-1 was not significantly superior to liwtMART-1  
189 ( $p=0.53$ , not shown). Taken together we can at this stage only conclude that the new  
190 construct is functional in DCs, but we might require to test more peptides before we can  
191 reach the same conclusions as in the Jurkat system (Fig. 3B). This is in agreement with our  
192 previous data where we show that liwt construct performed as efficiently as peptide loaded  
193 cells <sup>20</sup>. A possible explanation could be that a mutant li and wild type bind differently to  
194 MHCI. However, by co-immunoprecipitation experiments we found no difference in MHCI  
195 binding to the mutated li (li17R4RP<sub>6</sub>) as compared to binding to wild type li (Sup Fig. 2).  
196 Together these data support the proposition that liR<sub>4</sub>R<sub>6</sub>P/L<sub>17</sub>A improved the loading of  
197 peptide placed in CLIP region for MHCI mediated antigen presentation.

198

## 199 **DISCUSSION**

200 Previous studies have revealed that neither MHCI nor MHCII are AP3 dependent for  
201 trafficking and antigen presentation <sup>36</sup>. The kinetics of li transport and degradation are also  
202 unaffected in cells lacking AP-3 <sup>37</sup>. Through introduction of the AP-3, instead of the AP1/AP2  
203 binding motif, we successfully re-routed the li towards late endosomal compartments. In  
204 addition to the re-routing of li, the insertion of AP3 binding motif increased the kinetics of  
205 trafficking of li to the late endosomal compartment. Overall, our effort of bringing mutations in  
206 the li created a strict and direct sorting pathway with improved MHCI peptide loading  
207 efficacy. Here, we characterized the sub-cellular distribution of liR<sub>4</sub>RP<sub>6</sub>/L<sub>17</sub>A and compared  
208 with the liwt. Equal distribution of liwt to the early and late endosomes was observed



209 whereas liR4RP<sub>6</sub>/L<sub>17A</sub> was found to be mainly colocalizing with late endosomal markers. The  
210 direct sorting to endosomes also overcomes the property of delayed endosomal maturation <sup>29</sup>  
211 substantiating a faster antigen processing.

212 Recent studies have shown the role of li in trafficking of MHCI to the endosomal pathway and  
213 its implication in cross presentation <sup>18, 20</sup>. The description of li as a vehicle to perform antigen  
214 presentation has brought this molecule to the doorstep of the clinic not only as a target for  
215 immunotherapy <sup>38</sup> but also as a vector for increasing immune reactions towards specific  
216 oncogenic antigens <sup>20</sup>. Genetic exchange of the CLIP region with a peptide antigen  
217 substantially loads MHCI and presents the antigen on the cell surface. Our results showed  
218 that the antigenic peptide carried by liR4RP<sub>6</sub>/L<sub>17A</sub> can be detected by T cell carrying a  
219 specific TCR. Additionally, the antigen detection by the sTCR supports the specificity and the  
220 robustness of the liR4RP<sub>6</sub>/L<sub>17A</sub> mutant loading. Taken together, our data show that the  
221 modification in trafficking induced by the liR4RP<sub>6</sub>/L<sub>17A</sub> mutation can improve peptide loading  
222 and thus MHCI-peptide levels at the cell surface. In this study, liR4RP<sub>6</sub>/L<sub>17A</sub> carrying MART-1  
223 antigen was shown to be equally efficient in activating specific TCR carrying cells in  
224 comparison to liwt. In addition, we found that liR4RP<sub>6</sub>/L<sub>17A</sub> mutant was also competent to  
225 load enough peptide onto DC in order to prime primary naive T cells. These studies confirm  
226 the capacity of MHCI loading in the endosomal pathway and establish that the loading may  
227 take place in the proteolytic later parts of this pathway. Additional studies will be necessary to  
228 determine if such and AP3 binding mutation will be advantageous *in vivo*, for instance to  
229 improve immunotherapy using modified li as an immunization vector.

## 230 **METHODS**

### 231 **Recombinant cDNA constructs**

232 cDNA encoding human lip33 wt <sup>9</sup>, was subcloned into the pcDNA3 expression vector at  
233 *KpnI-BamHI*. Human lip33 mutants, li L<sub>17A</sub> and li L<sub>7A</sub> L<sub>17A</sub>, in the PSV51L expression vector

234 have also been described <sup>25</sup>. *KpnI* and *BamHI* restriction sites were introduced up and  
235 downstream of the li sequences respectively by PCR and the following primers were used: li-  
236 *KpnI* forward 5' AGAGA GGGTACCGTCATGGATGACCAGCGCGAC 3'. li-*BamHI* reverse -  
237 5' AGAGAGGGATCCTCACATGGGGACTGGGCCAG 3'. The li mutants were thereafter  
238 subcloned into pcDNA3 at *KpnI*-*BamHI*, behind the T7-RNA polymerase promoter, and li  
239 L<sub>17A</sub> was subsequently used as template for PCR quick change mutagenesis (all reagents  
240 used were included in the kit; QuickChange® Site-Directed Mutagenesis (Stratagene, La  
241 Jolla, CA, USA)) in order to generate the AP-3 binding motif RRP <sup>21</sup>. Primers used: L17A  
242 RRP sense 5' CCGTCATGGATGACCGTCGTCGCCCTTATCTCCAACAATG 3' and L17A  
243 RRP anti-sense 5' CATTGTTGGAGATAAGGGGACGACGGTCATCCATGACGG 3'. All  
244 primers were purchased by Eurofins MWG Operon (Ebersberg, Germany). mCherry-li was  
245 made by cloning liwt in frame to the C terminal end of mCherry without the stop codon in  
246 pcDNA3 (a kind gift from Terje Espevik, NTNU, Trondheim, Norway). mCherry- liR<sub>4R6P</sub>/L<sub>17A</sub>  
247 was purchased from GenScript (Piscataway, NJ, USA). HLA-A2-GFP has been described  
248 and transfections were carried out as already described <sup>20</sup>. GFP-Rab5 and GFP-Rab7 were  
249 supplied by Cecilia Bucci <sup>39</sup>. All CLIP-antigenic peptide constructs (liMART1) were cloned by  
250 site direct mutagenesis of the liwt and liR<sub>4R6P</sub>/L<sub>17A</sub> construct subcloned in pENTR vector  
251 (Invitrogen, Oslo, Norway). The mutagenesis to change the CLIP peptide (MRMATPLLM)  
252 into antigenic peptides (MART1: ELAGIGILTV) was performed as described <sup>20</sup>. After  
253 sequence verification, these constructs were recombined into a Gateway-converted pCI-  
254 pA102 <sup>40</sup>

## 255 **Cell culture, transfections and RNA interference**

256 HEK293 cells, human epithelial HeLa-Oslo and Madin Darby Canine Kidney (MDCK) cells  
257 were grown in Dulbecco's Modified Eagle Medium (DMEM, Bio Witthaker, Walkersville, MD,  
258 USA). All media were supplemented with heat-inactivated 10% fetal calf serum (FCS,  
259 HyClone, Logan, UT, USA). J76 were a kind gift from Miriam Hemskerk, (Leiden University

260 Medical Center, Leiden, The Nederland) SupT1 from Martin Pule (UCL, London, Great  
261 Britain), both cell lines were grown in RPMI+10% fetal calf serum. All cells were grown in a  
262 5% CO<sub>2</sub> incubator at 37°C. Transient transfections were performed with either lipofectamine  
263 2000 reagent from Invitrogen (Hek293 cells, MDCK) or with FuGENE 6 (ProMega) (HeLa),  
264 both according to manufacturer's protocols. For siRNA interference (RNAi) we used the  
265 following oligonucleotides; the sense  $\mu$ 3A, 5'-GGAGAACAGUUCUUGCGGC-3' and the  
266 antisense 5'-GCCGCAAGAACUGUUCUCC-3' oligos, for negative control a scrambled  
267 sequence was used, sense: 5' ACUUCGAGCGUGCAUGGCUTT 3' and antisense scrambled  
268 control 5' AGCCAUGCACGCUCGAAGUTT 3'. All of the oligos were from Eurofins MWG  
269 Operon (Ebersberg, Germany) and are previously described <sup>36, 41</sup>. Transfection of HeLa with  
270 siRNA was performed as previously described <sup>42</sup>.

## 271 **Antibodies and reagents**

272 M-B741 was purchased from BD Biosciences (Franklin Lakes, NJ, USA). Labeling of  
273 antibody was with Alexa-647 performed according to manufacturer's protocol  
274 (Invitrogen/Molecular Probes, Carlsbad, CA, USA). Anti-actin was purchased from AbCam,  
275 (Cambridge, UK). The anti AP-3 antibody is affinity-purified rabbit antiserum directed at its  $\mu$   
276 subunit and was a kind gift from Professor Margaret S. Robinson (Cambridge, UK). The  
277 secondary antibodies: sheep anti-mouse- and sheep-anti rabbit-HRP were acquired from  
278 Invitrogen/Bio-Rad (Hercules, CA, USA). Anti-FLAGM2 monoclonal antibody was purchased  
279 at Sigma-Aldrich (Oslo, Norway). Soluble DMF5 TcR was prepared as described by Walseng  
280 *et al.* <sup>35</sup>.

281

## 282 **Biochemical analyses**

283 Metabolic labeling was performed using S<sub>35</sub>-labeled Cysteine/Methionine (Perkin Elmer,  
284 Waltham, MA, USA). Cells were seeded to 60%-70% confluence in 6-well plates; washed  
285 three times in Cys/Met-free DMEM; incubated in Cys/Met-free DMEM for 45 min followed by

286 a 30 minutes pulse with Cys/Met-free DMEM supplemented with 50 $\mu$ Ci S<sub>35</sub>. For the pulse  
287 chase assay, the cells were washed three times in DMEM containing 2mM L-glutamine,  
288 primocin, and 30% FCS and chased for indicated time periods. Immunoprecipitations were  
289 done at 4 °C over night with 1-2 $\mu$ g ml<sup>-1</sup> antibody in lysis buffer (50 mM Tris-HCl, pH 7,5, 150  
290 mM NaCl, 1% Tx100) supplemented with the protease inhibitor cocktail Protease Arrest (G-  
291 Biosciences, St. Louis, MO, USA). Antigen–antibody complexes were captured with Protein  
292 G-coupled Dynabeads (Invitrogen) and re-suspended in gel loading buffer containing 2%  
293 SDS, 125mM TrisHCL, 20% glycerol and 5%  $\beta$ -mercaptoethanol, or its non-reducing  $\beta$ -  
294 mercaptoethanol free counterpart. The samples were boiled for 5 min at 95° C , loaded onto  
295 4-20% Tris-HEPES-SDS gels (Pierce, Rockford, IL, USA), and transferred onto PVDF  
296 membranes (Millipore, Billerica, MA, USA). Antibody incubation was done in 5% skim milk  
297 (BioRad, Hercules, CA, USA) at room temperature and immunoprecipitated protein was  
298 detected using Amersham® ECL Plus Western Blot Detection System (GE Healthcare,  
299 Buckinghamshire, UK). Radioactivity, however, was detected directly on ECL films (GE  
300 Healthcare, Buckinghamshire, UK). For the experiments including protease inhibitors, the  
301 same procedure was followed as for metabolic labeling. During the 30 min S<sub>35</sub>-Cys/Met  
302 pulse, 20 nM Cathepsin S Inhibitor (Merck Chemicals Ltd., Nottingham, UK) and/or 100  $\mu$ M  
303 Leupeptin (SIGMA ALDRICH) were added. The procedure was then continued as described  
304 above. For Endo H digestion, the beads were resuspended in 0.1 M sodium phosphate  
305 buffer (pH5.5) containing protease inhibitor as described above. The samples were divided  
306 into two and incubated for 15 minutes at room temperature with, or without 0,5 mU of Endo H  
307 (SIGMA). After the Endo H treatment, the samples were boiled at 95°C, and loaded onto gels  
308 as described above.

### 309 **Flow cytometry**

310 Indicated samples were acquired using a BD LSR II flow cytometer and the data were  
311 analysed using FlowJo software (Treestar Inc., Tilburg, The Netherlands).

## 312 **Spinning disk – and confocal laser scanning microscopy**

313 MDCK cells were grown to 70% confluence in 35 mm microwell dishes (MarTek, Ashland,  
314 MA, USA). The cells were then transfected with; GFP-Rab5, GFP-Rab7a, li constructs and  
315 HLA-A2-GFP/ $\beta$ 2m. 1h prior to imaging, the cell medium was exchanged with complete  
316 DMEM without phenol red, and cells were incubated with M-B741-Alexa 647 to a final  
317 concentration of 1  $\mu$ g/mL. Live imaging was performed to eliminate fixation artifacts. Confocal  
318 images were acquired on an Olympus FluoView 1000 inverted microscope equipped with  
319 Plan/Apo 60/1.10 NA oil objective (Olympus, Hamburg, Germany). Constant temperature  
320 was set to 37 °C and CO<sub>2</sub> to 6% by an incubator enclosing the microscope stage.  
321 Fluorochromes were excited with 488nm, 543nm and 647nm lasers. All image acquisition was  
322 done by sequential line scanning to eliminate bleed-through. Live films were acquired using  
323 an Andor Revolution XD Spinning Disc microscope with PlanApo 60x1.42 NA oil immersion  
324 objective, as this microscope provides an ideal platform for high speed, high signal to noise  
325 imaging, with low bleach rate and low photo-toxicity. Three lasers were used; 488nm,  
326 561nm, and 640 nm, and 4 frames per minute were acquired for the total of 25 min. Images  
327 was processed with ImageJ (NIH, USA) and Illustrator (Adobe systems Inc., San Jose, CA,  
328 USA).

## 329 ***In vitro* generation of Dendritic cells for antigen presentation and T-cell priming assay**

330 Immature dendritic cells (DCs) were generated essentially as described in Subklewe, *et al.* <sup>43</sup>  
331 Briefly, monocytes obtained from leukapheresis product (REC Project no: 2013/624-15) were  
332 cultured for 2 days in CellGro DC medium (CellGenix, Freiburg, Germany) supplemented  
333 with GM-CSF and Interleukin-4 (IL-4) in Ultra-low attachment cell culture flasks (Corning).  
334 The immature DCs were electroporated with either mRNA encoding for mutant  
335 li17R4RP<sub>6</sub>/L<sub>17</sub>A MART-1 or wild type li (liwt) carrying MART-1 peptide. Cytokines facilitating  
336 maturation were used (IL-1 $\beta$ , IL-6, TNF- $\alpha$ , IFN- $\gamma$  (all from PeproTech, Rocky Hill, NJ),  
337 prostaglandin E<sub>2</sub> (PGE<sub>2</sub>), and TLR7/8 agonist R848 (MedChem Express, Sweden)) <sup>44</sup> and

338 cultured for 24h. Mature DCs were used in T cell priming experiment. DCs electroporated  
339 with wild type li mRNA (no CLIP replacement) and DCs loaded with MART-1 peptide (10 µM)  
340 were included as negative and positive control, respectively, in the priming assay. Briefly, the  
341 distinct DC populations were cultured with autologous PBMCs at 1:10 DC:T cell ratio. On day  
342 3, T cell cultures were supplemented with IL2 and IL7. On day 8, T cell cultures were re-  
343 stimulated with DCs and 10 days later T cells were stained with MART-1 dextramer  
344 (Immudex, Copenhagen, Denmark) to assess the presence of MART-1 antigen-specific T  
345 cells in the cultures.

346

## 347 **ACKNOWLEDGEMENTS**

348 We thank the NorMIC Oslo imaging platform at the Department of Biosciences, University of  
349 Oslo for use of imaging facilities. The financial support of the Norwegian Cancer Society  
350 (grants 4604944 to O. B.), the Research Council of Norway (grant 230779 to O. B., grants  
351 244388 and 254817 to E.M.I and M.R.M. and N.M, respectively and through its Centre of  
352 Excellence funding scheme to O.B., project number 179573) is gratefully acknowledged and  
353 South-Eastern Norway Regional Health Authority to S.W. (Innovation grant 13/00367-88) and  
354 to E.M. (grant 2010021).

## 355 **CONFLICT OF INTERESTS**

356 The authors declare that they have no conflict of interests.

## 357 **References**

- 358 1. Van Bergen J, Schoenberger SP, Verreck F, *et al.* Efficient loading of HLA-DR with a T helper  
359 epitope by genetic exchange of CLIP. *Proc Natl Acad Sci USA* 1997; **94**: 7499-7502.
- 360  
361 2. Bonehill A, Heirman C, Tuyaeerts S, Michiels A, Zhang Y, van der Bruggen P *et al.* Efficient  
362 presentation of known HLA class II-restricted MAGE-A3 epitopes by dendritic cells  
363 electroporated with messenger RNA encoding an invariant chain with genetic exchange of  
364 class II-associated invariant chain peptide. *Cancer Res* 2003; **63**: 5587-94.

- 365  
366 3. Holst PJ, Sorensen MR, Mandrup Jensen CM, *et al.* MHC class II-associated invariant chain  
367 linkage of antigen dramatically improves cell-mediated immunity induced by adenovirus  
368 vaccines. *J Immunol* 2008; **180**: 3339-46.
- 369  
370 4. Sanderson S, Frauwirth K, Shastri N. Expression of endogenous peptide-major  
371 histocompatibility complex class II complexes derived from invariant chain-antigen fusion  
372 proteins. *Proc Natl Acad Sci USA* 1995; **92**: 7217-7221.
- 373  
374 5. Wu TC, Guarnieri FG, Staveley-O'Carroll KF, Viscidi RP, *et al.* Engineering an intracellular  
375 pathway for major histocompatibility complex class II presentation of antigens. *Proc Natl*  
376 *Acad Sci USA* 1995; **92**: 11671-11675.
- 377  
378 6. Kang TH, Lee JH, Bae HC, *et al.* Enhancement of dendritic cell-based vaccine potency by  
379 targeting antigen to endosomal/lysosomal compartments. *Immunol Lett* 2006; **106**: 126-34.
- 380  
381 7. Mikkelsen M, Holst PJ, Bukh J, *et al.* Enhanced and sustained CD8+ T cell responses with an  
382 adenoviral vector-based hepatitis C virus vaccine encoding NS3 linked to the MHC class II  
383 chaperone protein invariant chain. *J Immunol* 2011; **186**: 2355-64.
- 384  
385 8. Landsverk OJ, Bakke O, Gregers TF. MHC II and the endocytic pathway: regulation by  
386 invariant chain. *Scand J Immunol* 2009; **70**: 184-93.
- 387  
388 9. Bakke O, Dobberstein B. MHC class II-associated invariant chain contains a sorting signal for  
389 endosomal compartments. *Cell* 1990; **63**: 707-716.
- 390  
391 10. Pieters J, Bakke O, Dobberstein B. The MHC class II-associated invariant chain contains two  
392 endosomal targeting signals within its cytoplasmic tail. *J Cell Sci* 1993; **106**: 831-46.
- 393  
394 11. Bremnes B, Madsen T, Gedde-Dahl M, *et al.* An LI and ML motif in the cytoplasmic tail of the  
395 MHC-associated invariant chain mediate rapid internalization. *J. Cell Sci.* 1994; **107**: 2021-  
396 2032.
- 397  
398 12. Rodionov DG, Bakke O. Medium chains of adaptor complexes AP-1 and AP-2 recognize  
399 leucine-based sorting signals from the invariant chain. *J. Biol. Chem.* 1998; **273**: 6005-6008.
- 400  
401 13. Hofmann MW, Honing S, Rodionov D, *et al.* The leucine-based sorting motifs in the  
402 cytoplasmic domain of the invariant chain are recognized by the clathrin adaptors AP1 and  
403 AP2 and their medium chains. *J Biol Chem* 1999; **274**: 36153-8.
- 404  
405 14. Sandoval IV, Bakke O. Targeting of membrane proteins to endosomes and lysosomes. *Trends*  
406 *Cell Biol* 1994; **4**: 292-7.

- 407  
408 15. Bonifacino JS, Traub LM. Signals for sorting of transmembrane proteins to endosomes and  
409 lysosomes. *Annu Rev Biochem* 2003; **72**: 395-447.
- 410  
411 16. Gregers TF, Fleckenstein B, Vartdal F, *et al.* MHC class II loading of high or low affinity  
412 peptides directed by li/peptide fusion constructs: implications for T cell activation. *Int*  
413 *Immunol* 2003; **15**: 1291-9.
- 414  
415 17. Neefjes J, Jongmsma ML, Paul P, *et al.* Towards a systems understanding of MHC class I and  
416 MHC class II antigen presentation. *Nat Rev Immunol* 2011; **11**: 823-36.
- 417  
418 18. Basha G, Omilusik K, Chavez-Steenbock A, *et al.* A CD74-dependent MHC class I  
419 endolysosomal cross-presentation pathway. *Nat Immunol* 2012; **13**: 237-45.
- 420  
421 19. van Luijn MM, van de Loosdrecht AA, Lampen MH, *et al.* Promiscuous Binding of Invariant  
422 Chain-Derived CLIP Peptide to Distinct HLA-I Molecules Revealed in Leukemic Cells. *PLoS One*  
423 2012; **7**: e34649.
- 424  
425 20. Walchli S, Kumari S, Fallang LE, *et al.* Invariant chain as a vehicle to load antigenic peptides on  
426 human MHC class I for cytotoxic T-cell activation. *Eur J Immunol* 2014; **44**: 774-84.
- 427  
428 21. Gupta SN, Kloster MM, Rodionov DG, *et al.* Re-routing of the invariant chain to the direct  
429 sorting pathway by introduction of an AP3-binding motif from LIMP II. *Eur J Cell Biol* 2006;  
430 **85**: 457-67.
- 431  
432 22. Rodionov DG, Honing S, Silye A, *et al.* Structural requirements for interactions between  
433 leucine-sorting signals and clathrin-associated adaptor protein complex AP3. *J Biol Chem*  
434 2002; **277**: 47436-43.
- 435  
436 23. Coulie PG, Brichard V, Van Pel A, *et al.* A new gene coding for a differentiation antigen  
437 recognized by autologous cytolytic T lymphocytes on HLA-A2 melanomas. *J Exp Med* 1994;  
438 **180**: 35-42.
- 439  
440 24. Valmori D, Fonteneau JF, Lizana CM, *et al.* Enhanced generation of specific tumor-reactive  
441 CTL in vitro by selected Melan-A/MART-1 immunodominant peptide analogues. *J Immunol*  
442 1998; **160**: 1750-8.
- 443  
444 25. Simonsen A, Stang E, Bremnes B, *et al.* Sorting of MHC class II molecules and the associated  
445 invariant chain (Ii) in polarized MDCK cells. *J Cell Sci.* 1997; **110**: 597-609.
- 446  
447 26. Lotteau V, Teyton L, Peleraux A, *et al.* Intracellular transport of class II MHC molecules  
448 directed by invariant chain. *Nature* 1990; **348**: 600-605.



- 449  
450 27. Schutze M-P, Peterson PA, Jackson MR. An N-terminal double-arginine motif maintains type  
451 II membrane proteins in the endoplasmic reticulum. *EMBO J.* 1994; **13**: 1696-1705.
- 452  
453 28. Claesson-Welsh L, Ploegh H, Peterson PA. Determination of attachment sites for N-linked  
454 carbohydrate groups of class II histocompatibility alpha-chain and analysis of possible O-  
455 linked glycosylation of alpha- and gamma-chains. *Mol.Immunol.* 1986; **23**: 15-25.
- 456  
457 29. Landsverk OJ, Barois N, Gregers TF, *et al.* Invariant chain increases the half-life of MHC II by  
458 delaying endosomal maturation. *Immunol Cell Biol* 2011; **89**: 619-29.
- 459  
460 30. Roche PA, Teletski CL, Stang E, *et al.* Cell surface HLA-DR-invariant chain complexes are  
461 targeted to endosomes by rapid internalization. *Proc Natl Acad Sci USA* 1993; **90**: 8581-8585.
- 462  
463 31. Robinson MS. Adaptable adaptors for coated vesicles. *Trends Cell Biol* 2004; **14**: 167-74.
- 464  
465 32. Stang E, Bakke O. MHC class II-associated invariant chain-induced enlarged endosomal  
466 structures: a morphological study. *Exp Cell Res* 1997; **235**: 79-92.
- 467  
468 33. Nordeng TW, Gregers TF, Kongsvik TL, *et al.* The cytoplasmic tail of invariant chain regulates  
469 endosome fusion and morphology. *Mol Biol Cell* 2002; **13**: 1846-56.
- 470  
471 34. Gorvel J-P, Escola J-M, Stang E, *et al.* Invariant chain induces a delayed transport from early  
472 to late endosomes. *J.Biol.Chem.* 1995; **270**: 2741-2746.
- 473  
474 35. Walseng E, Walchli S, Fallang LE, *et al.* Soluble T-cell receptors produced in human cells for  
475 targeted delivery. *PLoS One* 2015; **10**: e0119559.
- 476  
477 36. McCormick PJ, Martina JA, Bonifacino JS. Involvement of clathrin and AP-2 in the trafficking  
478 of MHC class II molecules to antigen-processing compartments. *Proc Natl Acad Sci U S A*  
479 2005; **102**: 7910-5.
- 480  
481 37. Sevilla LM, Richter SS, Miller J. Intracellular transport of MHC class II and associated invariant  
482 chain in antigen presenting cells from AP-3-deficient mocha mice. *Cell Immunol* 2001; **210**:  
483 143-53.
- 484  
485 38. Berkova Z, Tao RH, Samaniego F. Milatuzumab - a promising new immunotherapeutic agent.  
486 *Expert Opin Investig Drugs* 2010; **19**: 141-9.
- 487  
488 39. Bucci C, Thomsen P, Nicoziani P, *et al.* Rab7: a key to lysosome biogenesis. *Mol Biol Cell* 2000;  
489 **11**: 467-80.

- 490  
491 40. Walchli S, Loset GA, Kumari S, *et al.* A practical approach to T-cell receptor cloning and  
492 expression. *PLoS One* 2011; **6**: e27930.
- 493  
494 41. Borg M, Bakke O, Progida C. A novel interaction between Rab7b and actomyosin reveals a  
495 dual role in intracellular transport and cell migration. *J Cell Sci* 2014; **127**: 4927-39.
- 496  
497 42. Progida C, Malerod L, Stuffers S, *et al.* RILP is required for the proper morphology and  
498 function of late endosomes. *J Cell Sci* 2007; **120**: 3729-37.
- 499  
500 43. Subklewe M, Sebelin-Wulf K, Beier C, *et al.* Dendritic cell maturation stage determines  
501 susceptibility to the proteasome inhibitor bortezomib. *Hum Immunol* 2007; **68**: 147-55.
- 502  
503 44. Spranger S, Javorovic M, Burdek M, *et al.* Tippmer S *et al.* Generation of Th1-polarizing  
504 dendritic cells using the TLR7/8 agonist CL075. *J Immunol* 2010; **185**: 738-47.

505

506

## 507 **FIGURE LEGENDS**

### 508 **Figure 1: Biochemical characterization of liwt and liR<sub>4</sub>RP<sub>6</sub>/L<sub>17</sub>A**

509 **(A)** li constructs used in this study. The mutations done to li N-terminal cytoplasmic tail are  
510 indicated. CLIP: class II Invariant chain peptide; TM: transmembrane domain; TRI:  
511 trimerization domain; position 113 and 119: N-linked glycosylation positions. **(B-E)** For  
512 biochemical assays, HEK293 cells were transfected with li constructs as indicated. Twenty-  
513 four hours later, cleared cell lysates and immune complexes were collected, treated and  
514 loaded onto 4-20% SDS-PAGE gels and transferred to PVDF membranes for western blot  
515 (WB) analysis. All experiments were repeated three times. **(B)** Lysates were split into two,  
516 where half was treated with reducing sample buffer and boiled at 95 °C, while the other was  
517 subjected to non-reducing (without β-mercaptoethanol) sample buffer. Lysates were probed  
518 with anti-li (M-B741) and anti-actin antibodies. **(C-E)** Transfected cells were metabolically  
519 labeled with <sup>35</sup>S-Methionine and Cysteine for 30 minutes, washed three times in DMEM and  
520 lysed. Radioactivity was detected directly on ECL films. **(C)** Lysates were divided into two

521 where half was subjected to a 15 minutes Endo H treatment prior to immunoprecipitation (IP)  
522 with M-B741. Three li fractions were found for all constructs; the light /Endo H sensitive ER  
523 fraction, the premature Endo H resistant fraction with only one glycan and the fully mature  
524 double N-linked glycosylated mature fraction of li. **D)** Lysates were collected at time points 0,  
525 0.5, 1 and 4 hours after 30 min of the radioactive pulse, and were immunoprecipitated with  
526 M-B741. The radioactivity was further quantified using the tool in ImageJ software, and the  
527 graph depicts the protein levels and half-life of the different li constructs, as indicated. The  
528 data shown in the graph are obtained from three independent experiments. **(E)** After the  
529 pulse, cells were incubated for 30 minutes in the presence of: none, one or the other, or both  
530 leupeptin and Cathepsin S inhibitor, 24h post-transfection. Lysates were probed with M-B741  
531 and anti-actin. The protein levels were quantified using imageJ. **(F)** HeLa cells treated with  
532 either scrambled siRNA (control) or siRNA directed against AP-3, were transfected with li  
533 constructs as indicated. Lysates were run onto 10% SDS-PAGE gels and transferred to  
534 PVDF membranes, where they were probed with anti  $\mu$ -AP-3, M-B741 and anti-actin  
535 antibodies and proteins were quantified using imageJ.

536

## 537 **Figure 2: Intracellular distribution of liwt and liR4RP<sub>6</sub>/L<sub>17</sub>A**

538 **(A)** MDCK cells were transfected with mCherry-liwt or mCherry-liR4RP<sub>6</sub>/L<sub>17</sub>A in combination  
539 with GFP-Rab5 or **(B)** GFP-Rab7a as indicated. 24 h post-transfection, the cells were  
540 incubated with M-B741-Alexa 647 (anti li antibody) for 1h prior to the live cell imaging at 37°C  
541 using the Olympus FluoView 1000 inverted microscope equipped with Plan/Apo 60/1.10 NA  
542 oil objective. All samples were analyzed in media without phenol red. The images show  
543 representative cells and were processed using ImageJ. Three independent experiments  
544 were performed, in total 15 cells per condition. Scale bar 15  $\mu$ m. The graph shows the  
545 quantification of the co-localization of li in GFP-Rab5 positive vesicles and is shown as mean  
546 + SEM of five different cells and indicated  $p$ -value was determined by unpaired  $t$ -test \*\*\*  $P <$

547 0.001. **(C)** The graph shows the quantification of M-B741-Alexa 647 uptake by the li  
548 constructs, as indicated, and is shown as mean + SEM of five different cells and indicated  $p$ -  
549 value was determined by unpaired  $t$ -test \*\*\*  $P < 0.001$ . This graph is representative of three  
550 independent experiments, where in total 15 cells were analyzed using ImageJ software. **(D)**  
551 SupT1 cells were transduced with liwt or liR<sub>4</sub>RP<sub>6</sub>/L<sub>17</sub>A constructs or left untreated (NT) and  
552 stained without permeabilization with anti-li antibodies. Presence of membrane li was  
553 detected by Flow cytometry. This staining is representative of two separate experiments. **(E)**  
554 SupT1 (HLA-A2+) cells were transduced with the indicated constructs. Around 10<sup>5</sup> cells were  
555 incubated with FLAG-tagged sTcR (estimated at 10 ng/mL) for 30 minutes at RT. Anti-FLAG  
556 antibody was finally used to detect sTcR and the binding was analyzed by flow cytometry.  
557 This experiment was repeated once with similar result.

558 **Figure 3: Antigen presentation with trafficking mutant increases MHCII-presentation**  
559 **and naive T-cell priming.**

560 **(A)** li constructs used in this study. The mutations done to li N-terminal cytoplasmic tail are  
561 indicated. MART1p: MART1 peptide (ELAGIGILTV); CLIP: class II li peptide; TM:  
562 transmembrane domain; TRI: trimerization domain. **(B)** SupT1 cells expressing HLA-A2 in  
563 combination with the indicated li construct (MART1p=MART1 peptide, irr = irrelevant peptide)  
564 or a single chain trimer (SCT) construct with MART1p or an irrelevant peptide as controls.  
565 J76 cells expressing DMF5 (HLA-A2-MART1p specific TCR) were co-incubated for 20 hours  
566 with the presenting cells and IL-2 level in the supernatant was detected by ELISA. The  
567 values are given as ng mL<sup>-1</sup> of IL-2, and error bars are  $\pm$ SD from two parallels,  $p$ -value was  
568 determined by unpaired  $t$ -test, this experiment was repeated once with similar results. **(C)**  
569 Dendritic cells (DCs) expressing HLA-A2 in combination with the indicated li constructs  
570 (mutant li17R<sub>4</sub>RP<sub>6</sub>/L<sub>17</sub>A carrying MART-1 peptide or wild type li, (liwt), carrying MART-1  
571 peptide) were generated as wells as a wild type li construct with unmodified CLIP region  
572 (liwtCLIP) and DCs loaded with MART-1 peptide as controls. Autologous T cells were primed

573 with the presenting cells (DCs) and co-incubated for 8 days. On day 9, T cells were  
574 restimulated with DCs and the presence of MART-1 specific T cells was detected by MART-1  
575 dextramer staining 19 days later. The values are given as frequency (%) of CD8+MART-1  
576 dextramer+ T cells and error bars are standard deviations (n=5), *P*-value was determined by  
577 unpaired *t*-test with Welch's correction and analysis was performed by GraphPadPrism  
578 software (GraphPad Software, San Diego, CA, US).

579

## Figure 1

**A**

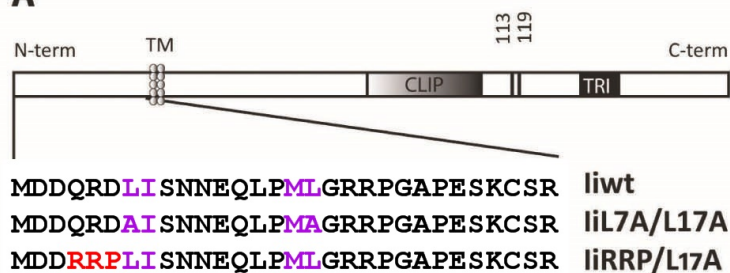

**B**

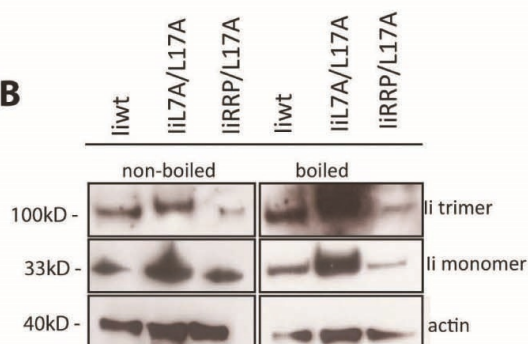

**C**

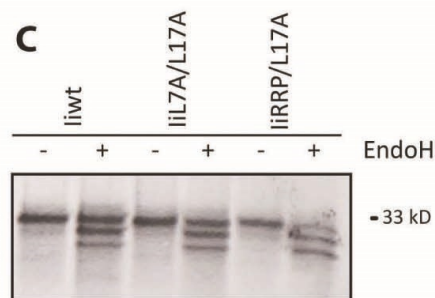

**D**

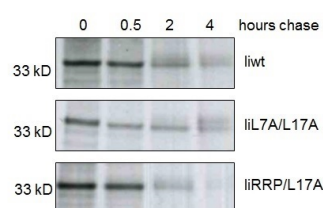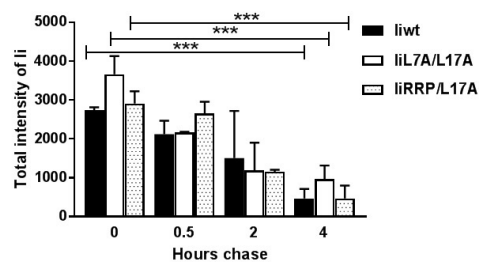

**E**

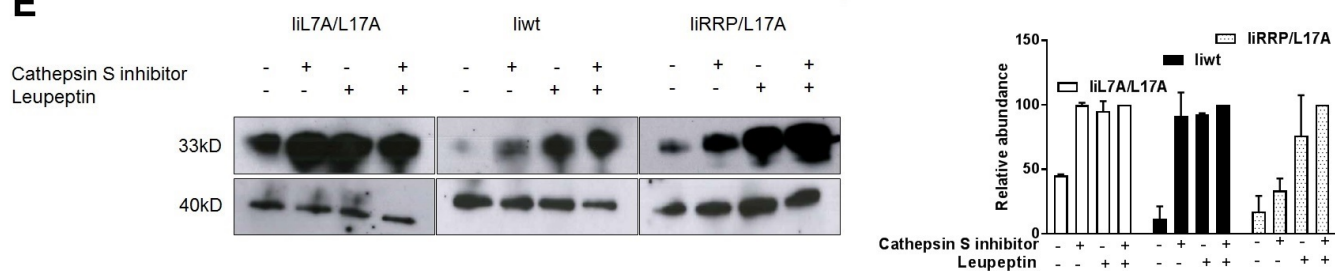

**F**

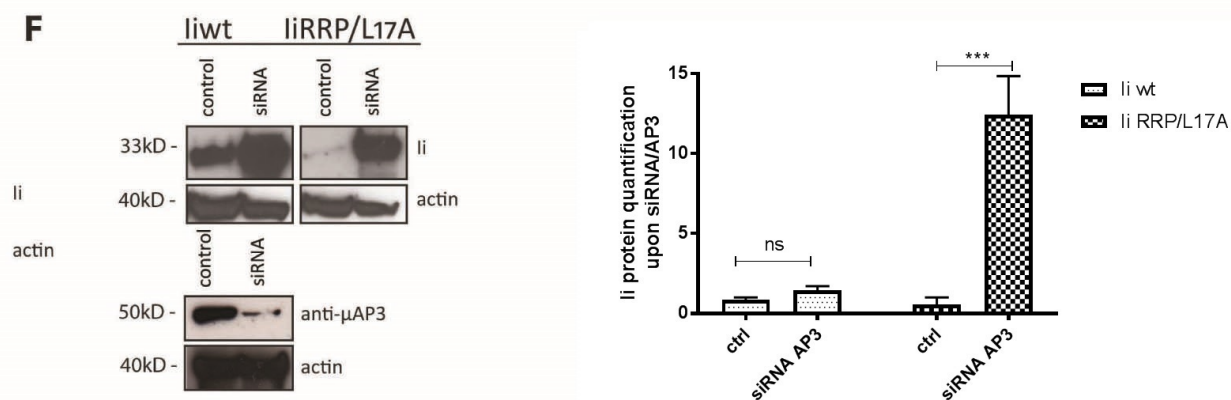

## Figure 2

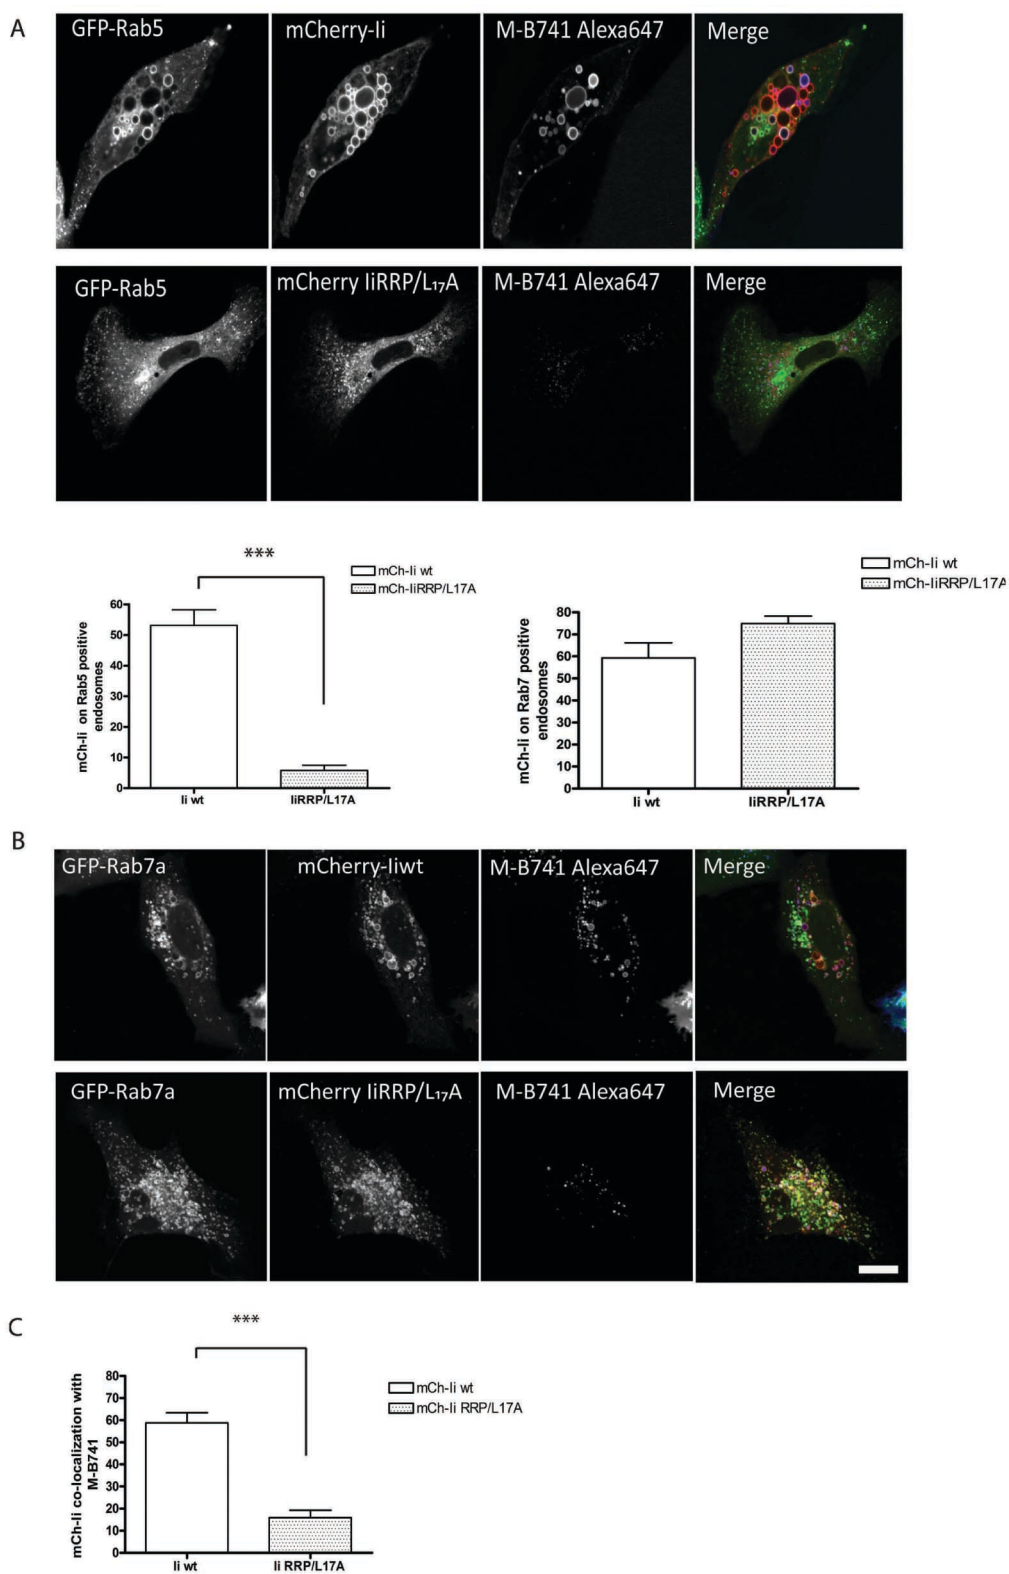

D

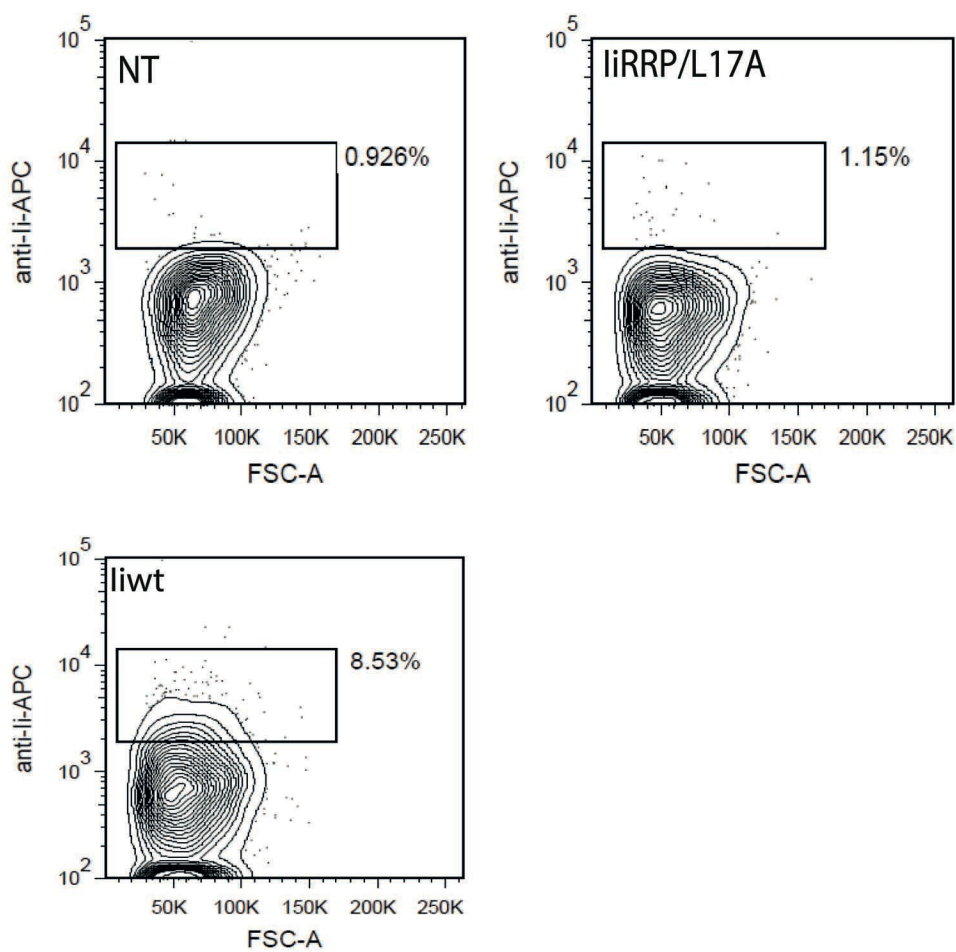

E

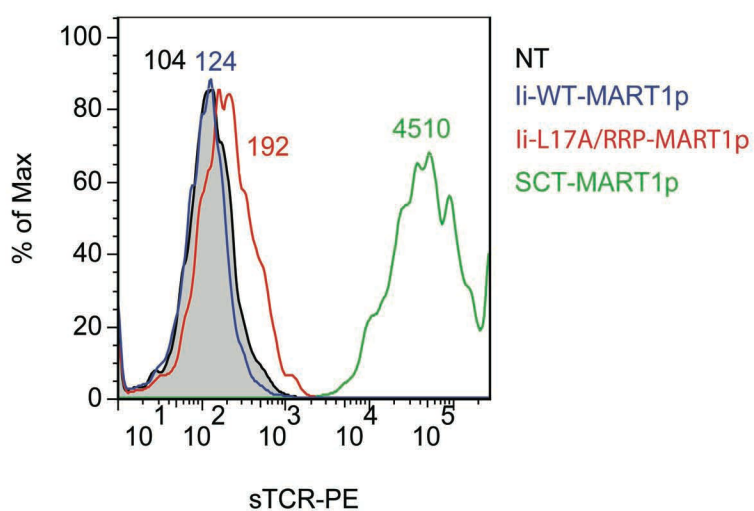



## Figure 3

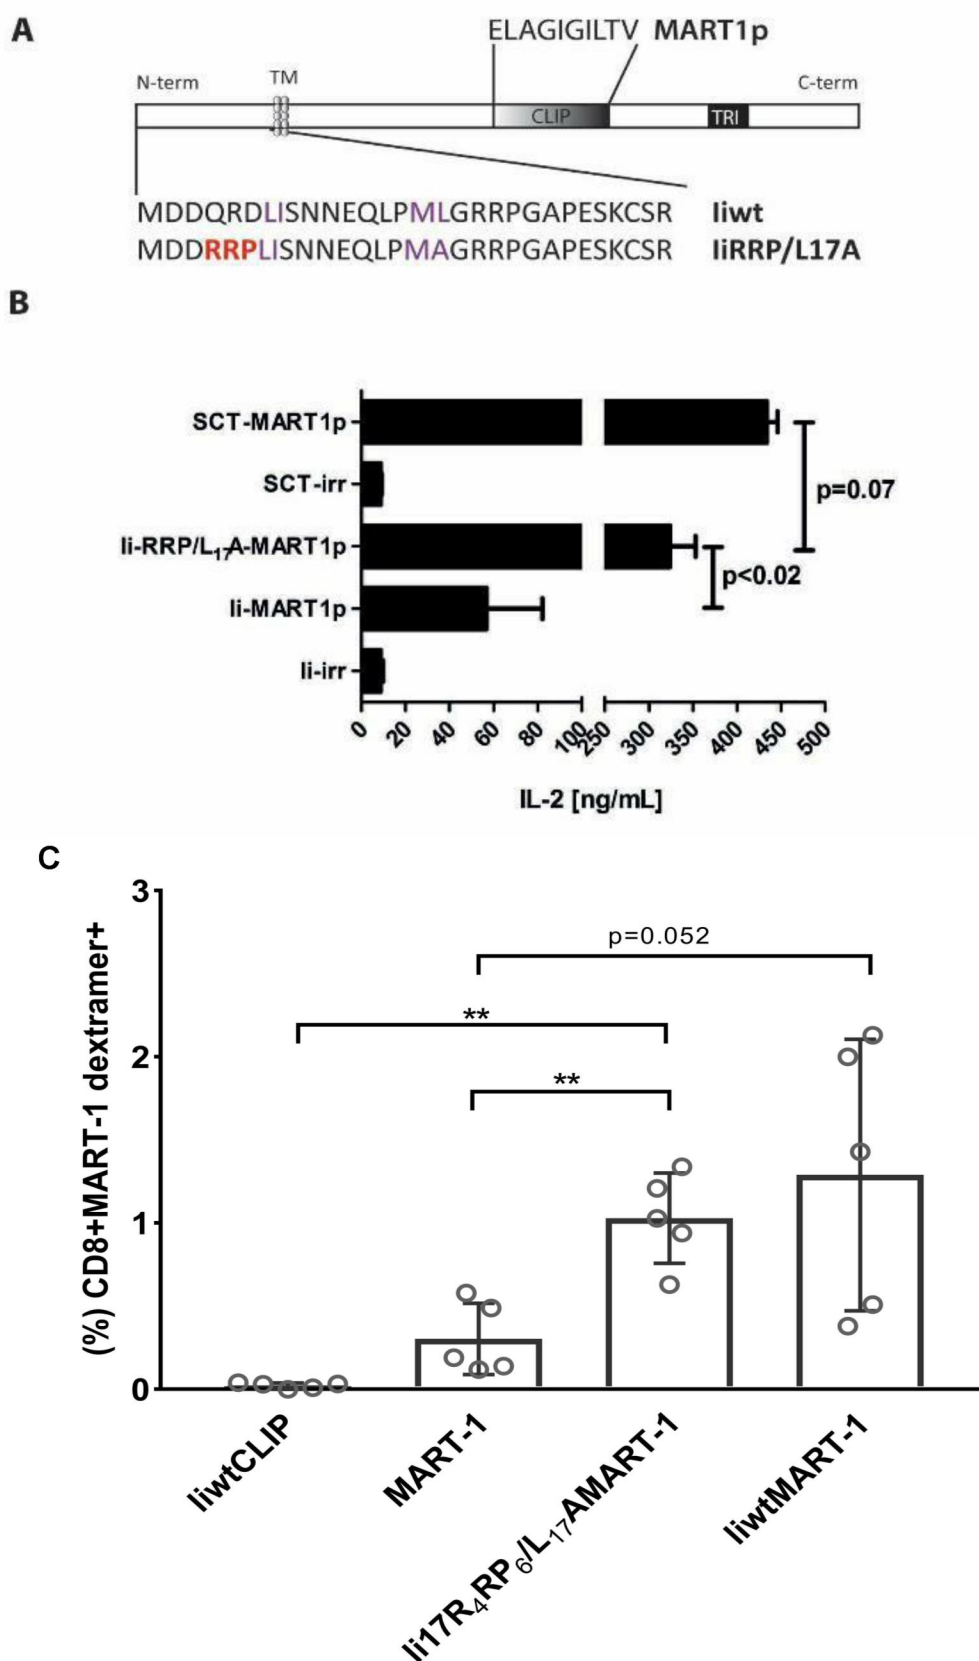

Source: https://www.biorxiv.org/content/10.1101/2020.05.13.091579v1.full.pdf
